# Supplementary material for: Heterogeneity in ess transcriptional organization and variable contribution of the Ess/Type VII protein secretion system to virulence across closely related Staphylocccus aureus strains
Source: PubMed Central journal article supplement (PMC4285178; doi:10.1111/mmi.12707), 2014-07-30
Supplement: mmi0093-0928-SD1.pdf [file mmi0093-0928-SD1.pdf]

1 **Supplementary Figures:**

2 **Fig S1. Relative standard curves for RT qPCR analysis of selected genes at the *ess***  
3 **locus.** RT-qPCR standard curves for: (A) 16S rRNA; (B) *esxA*; (C) *esaA*; (D) *essC* and (E)  
4 *esxB*. Standard curves were prepared as described in the materials and methods section  
5 using serial 10-fold dilutions of RN6390 genomic DNA. Data points represent individual  
6 results from three technical repeats at each dilution. Regression curves to calculate the  
7 efficiency of each primer pair were calculated using MxPro software (Stratagene).

8

9 **Fig S2. *EsaA*, *EssB* and *EssC* presence in RN6390 and individual *ess* deletion strains.**

10 The RN6390 wild-type (wt) or isogenic deletion strains, as indicated, were cultured in TSB  
11 medium until an OD<sub>600</sub> of 2 was reached. Whole cell samples were prepared as described in  
12 the Methods section, adjusted to a calculated cell density of OD 1 in LDS sample buffer and  
13 separated on bis-Tris gels (8 % for *EsaA* and *EssC* blots, 10% for *EssB* and 15% for *TrxA*).  
14 Immunoblotting was undertaken with anti-*EsaA*, anti-*EssB*, anti-*EssC* or anti-*TrxA*  
15 antibodies. An equivalent of 10 µl of cells from an OD<sub>600</sub> of 1 was loaded for each lane.  
16 Molecular weight markers are indicated to the left of each blot, and the specific protein band  
17 recognised by each antibody is indicated by an arrow to the right. The asterisk indicates a  
18 non-specific cross-reacting band.

19

20 **Fig S3. *EsxA* and *EsxC* secretion are restored to the *esaA* mutant strain by *in trans***  
21 **expression of a his-tagged allele of *esaA*.**

22 The RN6390 wild-type strain (wt), or the isogenic *esaA* mutant strain containing either  
23 pRMC2 empty vector (*esaA*), or pRMC2 encoding an N-terminally hexahistidine-tagged  
24 *EsaA* variant (*esaA pesaA*) were cultured in TSB medium. When an OD<sub>600</sub> of 0.5 was  
25 reached, one culture of *esaA pesaA* was supplemented with 100 ng/ml anhydrotetracycline

26 to induce plasmid-encoded overexpression of his-tagged EsaA (+++). All strains were  
27 subsequently grown until they reached OD<sub>600</sub> of 2. The cells were subsequently spun down  
28 and the supernatant (sn) was retained as the secreted protein fraction, while the pellet was  
29 retained as the cellular fraction. (A) Samples of the supernatant and cellular fractions (An  
30 equivalent of 250 µl of supernatant and 10 µl of cells adjusted to OD1) were separated on  
31 bis-Tris gels and immunoblotted using the anti-EsxA or EsxC antisera, or control antisera  
32 raised to TrxA (cytoplasmic protein). (B) Samples of the cellular fractions were separated on  
33 bis-Tris gels and immunoblotted using the anti-EsaA polyclonal antisera. The asterisk  
34 indicates a non-specific cross-reacting band.

35

36 **Fig S4. Deletion of the 12 gene *ess* locus has no effect on *S. aureus* RN6390 growth.**

37 The RN6390 wild-type (wt) or complete *ess* deletion ( $\Delta$ *ess*) strains were inoculated into 100  
38 µl volumes of either complex (TSB) or defined (RPMI) growth media in 96 well plates and  
39 cultured aerobically at 37°C for the indicated time period. Note that in this growth format,  
40 optical density at 600nm did not exceed 1 unit, whereas in batch culture it routinely reaches  
41 OD<sub>600</sub> >6.

42

43 **Fig S5. The ESS system is dispensable for *S. aureus* virulence in the wax moth larvae**

44 **infection model.** Kaplan-Meier survival curves showing the survival of *Galleria Mellonella*  
45 larvae over seven days following infection with (A) *S. aureus* strain RN6390 and the isogenic  
46 *ess* deletion ( $\Delta$ *ess*) strain and (B) *S. aureus* strain COL and the isogenic *ess* deletion ( $\Delta$ *ess*)  
47 strain. Curve comparisons are not statistically significant using the log rank test ( $p=0.6$  for  
48 RN6390 and  $p=0.5$  for COL). Curves are generated from  $n=30$  larvae in each group  
49 (experiments performed as 10 in each group repeated 3 times). Larvae injected with 10µl of  
50 phosphate-buffered saline as a control (not shown) demonstrated no mortality over 1 week  
51 of observation ( $n=10$ ).

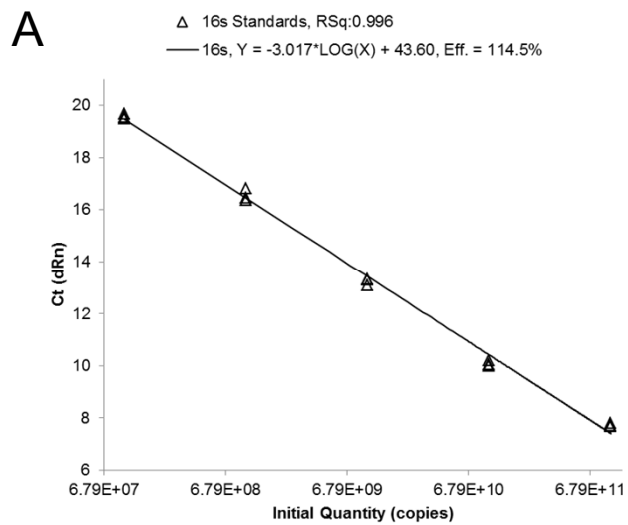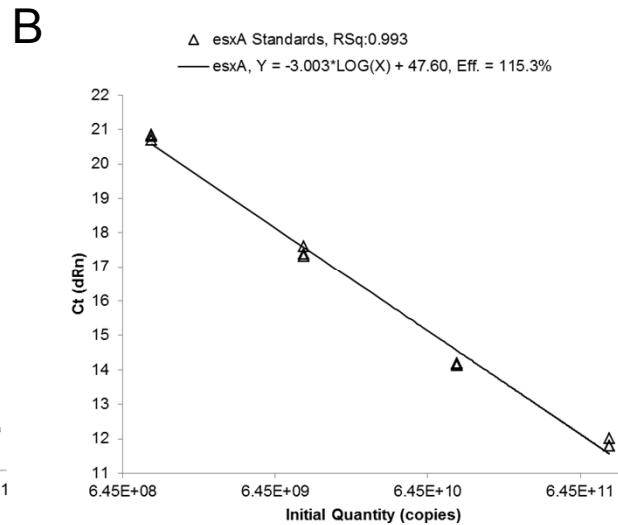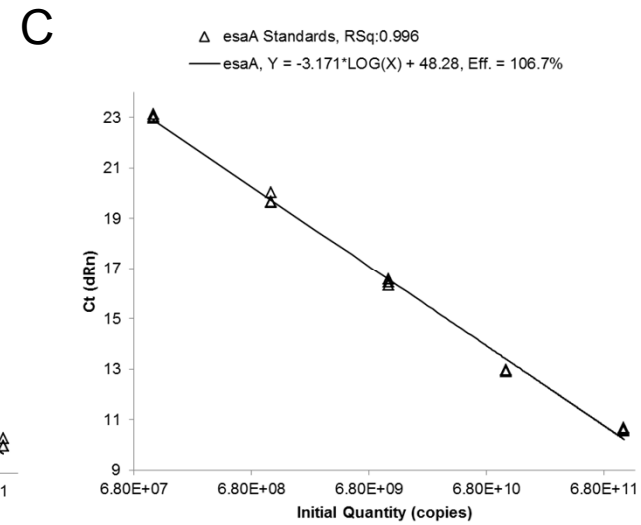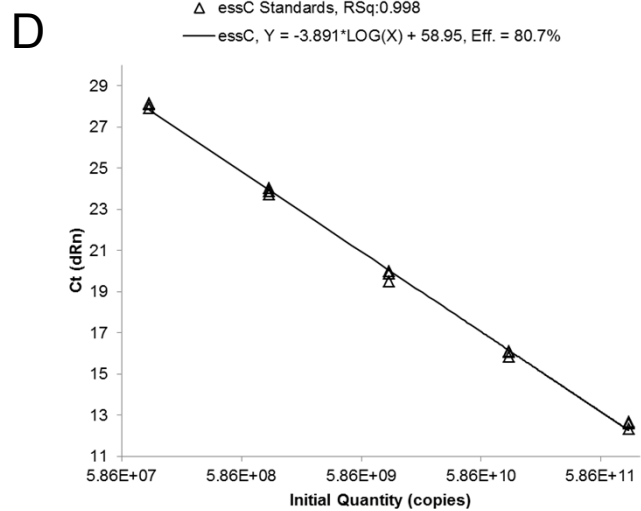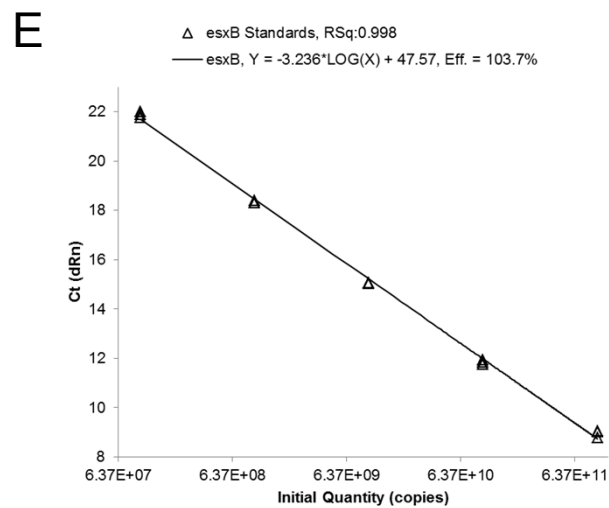

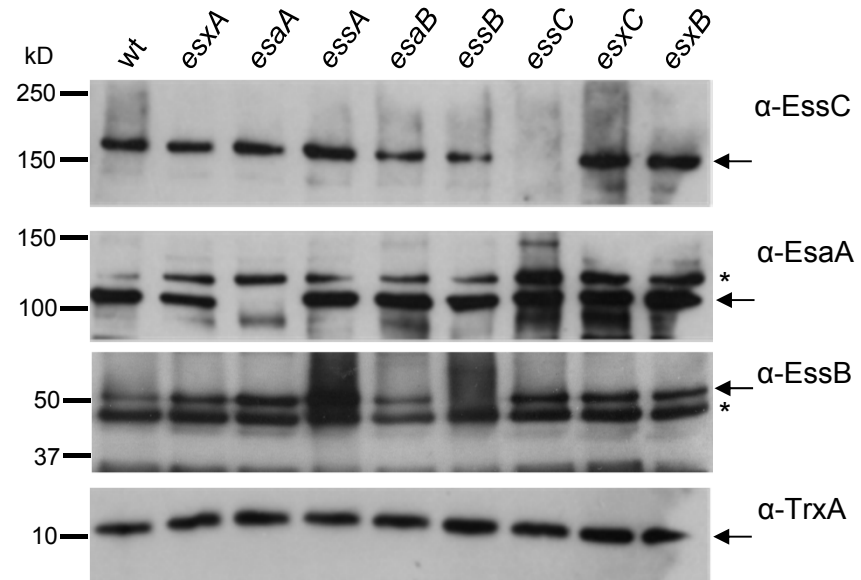

Kneuper *et al.* Fig S2

A

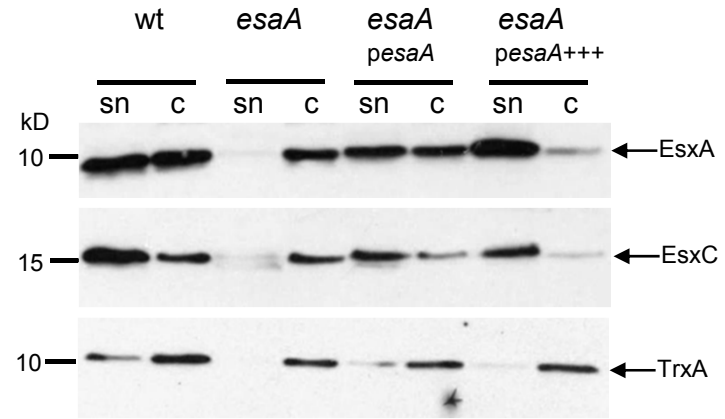

B

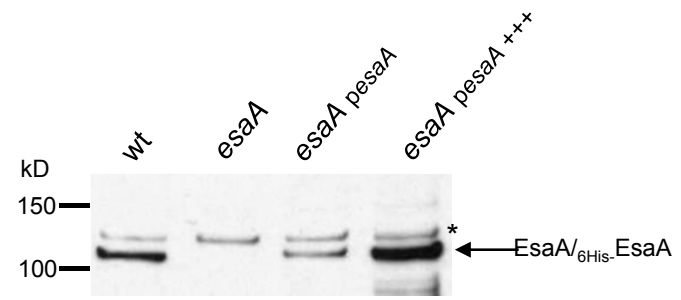

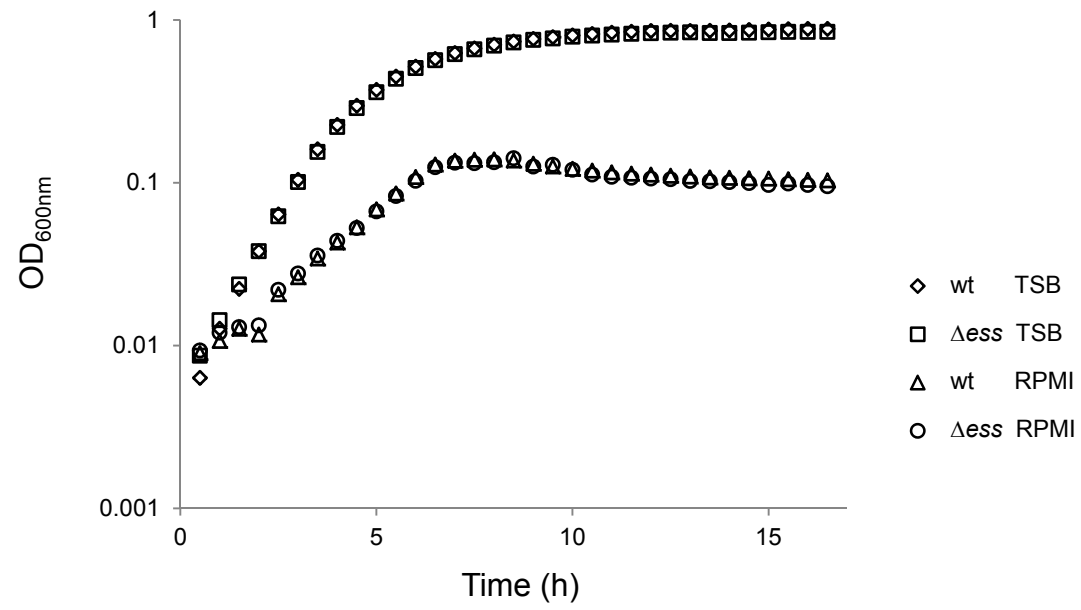

Kneuper *et al.* Fig S4.

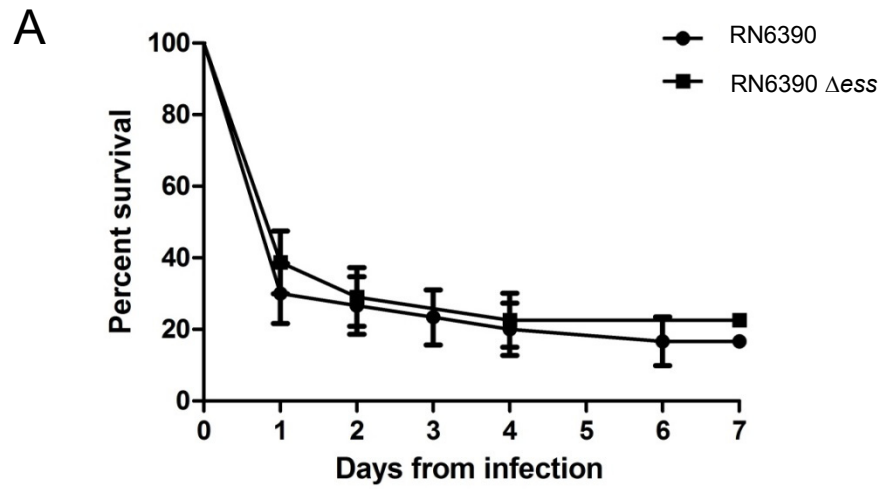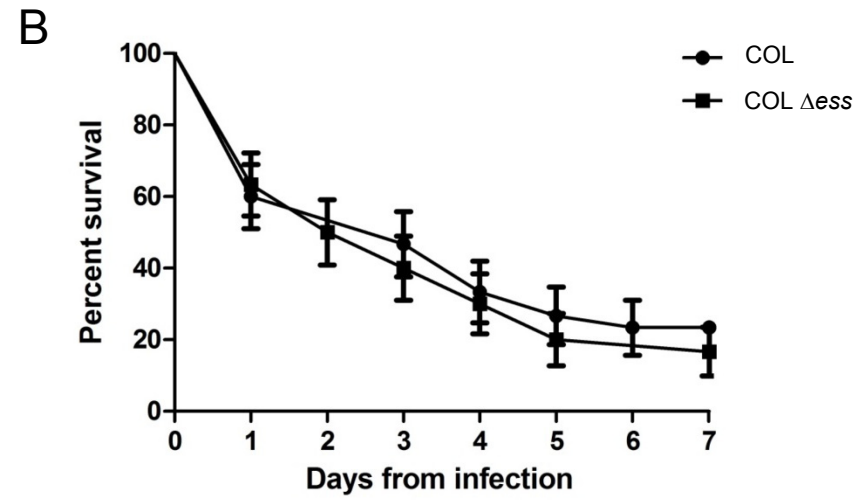

| <b>Primer</b>        | <b>Sequence (5'-3')</b>                                        | <b>Usage</b>                                                               |
|----------------------|----------------------------------------------------------------|----------------------------------------------------------------------------|
| EsxAdA1              | AATGTGCGAATTCTGACCAC                                           | Amplification of <i>esxA</i> flanking regions for cloning into pIMAY       |
| EsxAdA2              | TGCTTATTGCATTGCCATAACTAGAAACC                                  |                                                                            |
| EsxAdB1              | TTGTTGAATTCGTTAAGTAC                                           |                                                                            |
| EsxAdB2              | ATGGCAATGCAATAAGCATTCTGAAATTG                                  |                                                                            |
| EsaAdA1              | TAGGATCCACATTTATATTACAAAAATG                                   | Amplification of <i>esaA</i> flanking regions for cloning into pIMAY       |
| EsaAdA2              | AAAGTGTTTCTTTTTTCATGCTTATTTCC                                  |                                                                            |
| EsaAdB1              | ATTGAATTCTCCAAACTATCC                                          |                                                                            |
| EsaAdB2              | ATGAAAAAGAAACACTTTAAGAAAGAGAG                                  |                                                                            |
| EssAdA1              | TGATGAATTC <del>ACT</del> TATCAATG                             | Amplification of <i>essA</i> flanking regions for cloning into pMAD        |
| EssAdA2              | AGTCAAAAACATCAACATTAGATTAATCTC                                 |                                                                            |
| EssAdB1              | GTCATAATGAATTCGGAAAC                                           |                                                                            |
| EssAdB2              | ATGTTGATGTTTTTGACTTTAGGATTTGTC                                 |                                                                            |
| EsaBdA1              | ACTAATAGAATTCACCATTG                                           | Amplification of <i>esaB</i> flanking regions for cloning into pMAD        |
| EsaBdA2              | CTATAGTAAATCAAATGTTACTTTTACGTG                                 |                                                                            |
| EsaBdB1              | AAGGATCCTTCAACTAAAGCATCAAATG                                   |                                                                            |
| EsaBdB2              | ACATTTGATTTACTATAGGAGGAAAAATAG                                 |                                                                            |
| EssBdA1              | AATGATGCGAATTCTAAGCAG                                          | Amplification of <i>essB</i> flanking regions for cloning into pMAD        |
| EssBdA2              | CTATTTTTTTTTAACCATCTATTTTTCTC                                  |                                                                            |
| EssBdB1              | ATGCCACTGAATTCTGACTC                                           |                                                                            |
| EssBdB2              | ATGGTTAAAAAAAATAGTATAGGACTGAG                                  |                                                                            |
| EssCdA1              | AGTACTGAATTCGTATGATG                                           | Amplification of <i>essC</i> flanking regions for cloning into pIMAY       |
| EssCdA2              | AAACCATCTTTTATGCATTGTCTTTGCCTC                                 |                                                                            |
| EssCdB1              | AGGGATCCGTTGCGTTTGCTTTTGACATG                                  |                                                                            |
| EssCdB2              | ATGCATAAAAGATGGTTTAAATAGCAATG                                  |                                                                            |
| EsxCdA1              | AACGGATCCAGCAATGATTTTCATCAG                                    | Amplification of <i>esxC</i> flanking regions for cloning into pMAD        |
| EsxCdA2              | TTAATTCATAAAATTCATAACATACCTCC                                  |                                                                            |
| EsxCdB1              | TCATGAATTCGAATATTTACAATGGCGC                                   |                                                                            |
| EsxCdB2              | ATGAATTTTATGAATTAATATTGAGGTGAAG                                |                                                                            |
| EsxBdA1              | AGGAATTCGTATTTTCAGACCAACAATTC                                  | Amplification of <i>esxB</i> flanking regions for cloning into pMAD        |
| EsxBdA2              | CACCCTATCTCCACCCATATCTTCACCTC                                  |                                                                            |
| EsxBdB1              | TCGGATCCAAATAATTCTCGTATAAATG                                   |                                                                            |
| EsxBdB2              | ATGGGTGGAGATAGGGTGAACCCATGATG                                  |                                                                            |
| EsxAdA1              | AATGTGCGAATTCTGACCAC                                           | Amplification of <i>ess</i> operon flanking regions for cloning into pIMAY |
| EsxdA2               | TTATTCTTCCATTGCCATAACTAGAAACC                                  |                                                                            |
| EsxdB1               | GAAGAGCTCATAATGATTTTGTACAGC                                    |                                                                            |
| EsxdB2               | ATGGCAATGGAAGAATAAACTATCTTAATG                                 |                                                                            |
| pRMC2seq1            | ATTTGGATCCCCTCGAGTTCATG                                        | His-tag insertion                                                          |
| Nhisins              | AAAGATCTTCCTGAATGATGATGATGATGATGC<br>ATAACTAGAAACCTCCTGGTACCGC | N-terminal his-tag insertion pRMC2                                         |
| <i>esaA</i> nhis fw  | GGAAGATCTAAAAAGAAAATTGGATTTATG                                 | <i>esaA</i> cloning into pRMC2h                                            |
| <i>esaA</i> nhis rev | GGTGAAGCTCATTAGATTAATCTCTCTTTCTTAAAG                           |                                                                            |
| pET27bmodEsxA        | GCGCGT <del>CGA</del> CAATGGCGATG                              | Antibody production                                                        |
|                      | GCGCCT <del>CGAG</del> TACTGCAGGCCAAAGTTGTTGC                  | Antibody production                                                        |
| pET27bmodEsaA        | GCGCGT <del>CGAC</del> ACAGACCGTGAAAGAAAACCTG                  | Antibody production                                                        |



|                |                                              |                     |
|----------------|----------------------------------------------|---------------------|
|                | GATAAAC                                      |                     |
|                | GCGCCTCGAGTTACGCGTGCAGTTTGTTCACG             | Antibody production |
|                | TTGTTATC                                     |                     |
| pET27bmodEsaC  | GCGC <u>CTCGACA</u> AATGAACTTTAACGATATTGAAA  | Antibody production |
|                | CG                                           |                     |
|                | GCGCCTCGAGTTAGTTCATCGCTTTGTAAAAT             | Antibody production |
|                | ATTGCTCG                                     |                     |
| pET27bmodEssB  | GCGC <u>GTCGAC</u> ACAGGATATGCTGACCCCGCTG    | Antibody production |
|                | GATG                                         |                     |
|                | GCGCCTCGAGCTACACGGTATGGCCCACTTTG             | Antibody production |
|                | CGCAC                                        |                     |
| pET27bmodEssC  | GCGC <u>GTCGAC</u> GAAAGATCTGGTGAAACCG       | Antibody production |
|                | GCGCCTCGAGTTATTTAAACCAGCGAATTTTCT            | Antibody production |
|                | G                                            |                     |
| region-1-f     | CAGGAGGTTTCTAGTTATGGC                        | RT-PCR              |
| region-1-r     | GTTCTTGAACGGCATCAGC                          | RT-PCR              |
| region-2-f     | TTACGGGCAAGGTTTCAGACC                        | RT-PCR              |
| region-2-r     | GTAATAATTCCGGGAAGTCG                         | RT-PCR              |
| region-3-f     | CTAAGACAGGTTAAATCTATCGG                      | RT-PCR              |
| region-3-r     | TGCTTCTTCAGCATCTCTAAAGGCG                    | RT-PCR              |
| region-4-f     | GCATATGTACGCAAAGTAGGAC                       | RT-PCR              |
| region-4-r     | TCGTTAGTTGCTCTTGAGTTC                        | RT-PCR              |
| region-5-f     | CTTGAACATTTTATTTGTCCGGC                      | RT-PCR              |
| region-5-r     | AGCCACTTTAAACCTGCATC                         | RT-PCR              |
| region-6-f     | ATGCAGGTTTTAAAGTGGCTAC                       | RT-PCR              |
| region-6-r     | CGCATCATCCATTGTTGTATCT                       | RT-PCR              |
| region-7-f     | TGGGTCAAACATAAAGCGTGC                        | RT-PCR              |
| region-7-r     | TCGCATGATGTCCATGGTTC                         | RT-PCR              |
| esxA-GSP1      | GTTCTTGAACGGCATCAGC                          | 5' RACE             |
| esxA-GSP2      | ACGGCATCAGCAGTGCTATTC                        | 5' RACE             |
| esxA-GSP3      | CGCGCTCGAGATTTCTTCTAATAATTGTGC               | 5' RACE             |
| esaA-GSP1      | TCAAACCAGACTCAGCAAGG                         | 5' RACE             |
| esaA-GSP2      | AATGCTTGACCCAGCTCAAC                         | 5' RACE             |
| esaA-GSP3      | CGCGAATTCCCTTTTTCTGATTGATCTCC                | 5' RACE             |
| Anchor primer1 | GACCACGCGT <u>ATCGAT</u> GTTCGACTTTTTTTTTTTT | 5' RACE             |
|                | TTTTV                                        |                     |
| Anchor primer2 | GACCACGCGT <u>ATCGAT</u> GTTCGAC             | 5' RACE             |
| M13-F          | GTA AACGACGGCCAGT                            | 5' RACE             |
| esxA-QPCR-F    | TGGCAATGATTAAGATGAGTCC                       | RT-qPCR             |
| esxA-QPCR-R    | TCTTGTTCTTGAACGGCATC                         | RT-qPCR             |
| esaA-QPCR-F    | TGGCTATAGAGCGAAATTCATC                       | RT-qPCR             |
| esaA-QPCR-R    | CCAAGCCTATAGGATGCTCTG                        | RT-qPCR             |
| essC-QPCR-F    | TTTCGATGTTGCAAGACACC                         | RT-qPCR             |
| essC-QPCR-R    | GACATGCGGAATTGTTTCAC                         | RT-qPCR             |
| esxB-QPCR-F    | GGTATTAAGCAGATGGTGGCAAG                      | RT-qPCR             |
| esxB-QPCR-R    | GTCAGCCATCGGTTGTACTAATTC                     | RT-qPCR             |
| 16S rRNA-F     | GTGCACATCTTGACGGTACCTA                       | RT-qPCR             |

16S rRNA-R

CCACTGGTGTTCCCTCCATATC

RT-qPCR

---

**Table S1.** Oligonucleotide primers used in this study. Restriction enzyme sites are underlined.
